# Supplementary material for: Dietary dairy product intake and incident type 2 diabetes: a prospective study using dietary data from a 7-day food diary
Source: PubMed Central journal article supplement (PMC3980034; doi:10.1007/s00125-014-3176-1), 2014-02-08
Supplement: 125_2014_3176_MOESM1_ESM.pdf [file 125_2014_3176_MOESM1_ESM.pdf]

ESM Table 1 Baseline characteristics in the subcohort (n=3,502) by tertile of yoghurt intake: EPIC-Norfolk Study

| Variable                                                    | Yoghurt intake (g/d) <sup>a</sup> |                   |                   | p-value <sup>b</sup> |
|-------------------------------------------------------------|-----------------------------------|-------------------|-------------------|----------------------|
|                                                             | Tertile 1 (n=2,243)               | Tertile 2 (n=632) | Tertile 3 (n=627) |                      |
| Total dairy intake (g/day) <sup>c</sup>                     | 245 ± 160                         | 276 ± 135         | 347 ± 159         | <0.001               |
| <i>Anthropometric and socio-demographic characteristics</i> |                                   |                   |                   |                      |
| Men <sup>d</sup>                                            | 1,089 (48.6)                      | 226 (35.8)        | 204 (32.5)        | <0.001               |
| Age (years) <sup>c</sup>                                    | 59 ± 10                           | 59 ± 9            | 59 ± 9            | 0.941                |
| Waist circumference (cm)                                    |                                   |                   |                   |                      |
| Men <sup>c</sup>                                            | 95.8 ± 9.9                        | 95.0 ± 9.2        | 95.0 ± 8.9        | 0.317                |
| Women <sup>c</sup>                                          | 81.8 ± 11.0                       | 81.4 ± 10.4       | 81.7 ± 9.7        | 0.793                |
| BMI (kg/m <sup>2</sup> ) <sup>c</sup>                       | 26.3 ± 3.9                        | 26.1 ± 3.9        | 26.3 ± 3.6        | 0.290                |
| Alcohol (units/week) <sup>e</sup>                           | 4.0 (1.0, 10.5)                   | 4.0 (1.5, 9.0)    | 2.5 (1.0, 7.5)    | <0.001               |
| Smoking: current <sup>d</sup>                               | 297 (13.4)                        | 57 (9.06)         | 44 (7.04)         | <0.001               |
| Education: degree or higher <sup>d</sup>                    | 276 (12.3)                        | 106 (16.8)        | 95 (15.2)         | 0.002                |
| Physical activity: Active <sup>d</sup>                      | 424 (18.9)                        | 116 (18.4)        | 128 (20.4)        | 0.037                |
| Social class:                                               |                                   |                   |                   |                      |
| Professional/managerial <sup>d</sup>                        | 936 (41.7)                        | 294 (46.5)        | 264 (42.1)        | 0.094                |
| <i>Dietary intakes</i>                                      |                                   |                   |                   |                      |
| Energy (kJ/day) <sup>c</sup>                                | 8,251 ± 2272                      | 8,171 ± 1979      | 8,050 ± 2071      | 0.142                |
| Saturated fat (% TE) <sup>c</sup>                           | 13.3 ± 3.2                        | 12.8 ± 2.6        | 12.2 ± 2.9        | <0.001               |
| Monounsaturated fat (% TE) <sup>c</sup>                     | 12.1 ± 2.2                        | 11.9 ± 2.0        | 11.2 ± 2.1        | <0.001               |
| Polyunsaturated fat (% TE) <sup>c</sup>                     | 6.6 ± 1.8                         | 6.6 ± 1.6         | 6.2 ± 1.6         | <0.001               |
| Calcium (mg/day) <sup>c</sup>                               | 799 ± 285                         | 850 ± 236         | 952 ± 268         | <0.001               |
| Magnesium (mg/day) <sup>c</sup>                             | 283 ± 84                          | 299 ± 80          | 314 ± 89          | <0.001               |
| Vitamin D (µg/day) <sup>e</sup>                             | 2.75 (1.79, 4.23)                 | 2.78 (1.90, 4.17) | 2.73 (1.67, 3.95) | 0.435                |
| Fibre (g/day) <sup>c</sup>                                  | 14.44 ± 5.25                      | 15.62 ± 5.24      | 16.32 ± 5.57      | <0.001               |
| Fruit (g/day) <sup>c</sup>                                  | 143 ± 124                         | 179 ± 127         | 199 ± 139         | <0.001               |
| Vegetables (g/day) <sup>e</sup>                             | 79 (46, 120)                      | 81 (49, 123)      | 88 (54, 139)      | <0.001               |
| Processed meat (g/day) <sup>c</sup>                         | 29 ± 28                           | 26 ± 22           | 25 ± 25           | 0.012                |
| Red meat (g/day) <sup>e</sup>                               | 12 (0, 27)                        | 8 (0, 24)         | 9 (0, 22)         | 0.006                |
| Coffee (g/day) <sup>e</sup>                                 | 279 (40, 568)                     | 322 (104, 598)    | 303 (80, 608)     | 0.003                |

<sup>a</sup>Tertile cut-offs are based on absolute intakes of total dairy

<sup>b</sup>p-value as calculated using ANOVA or Kruskal-Wallis ANOVA for non-parametric data

<sup>c</sup>Mean ± SD; all such values

<sup>d</sup>n; % in parentheses; all such values

<sup>e</sup>Median; interquartile range in parentheses; all such values

TE, total energy
