# Supplementary material for: Dietary dairy product intake and incident type 2 diabetes: a prospective study using dietary data from a 7-day food diary
Source: PubMed Central journal article supplement (PMC3980034; doi:10.1007/s00125-014-3176-1), 2014-02-08
Supplement: 125_2014_3176_MOESM2_ESM.pdf [file 125_2014_3176_MOESM2_ESM.pdf]

ESM Table 2 Description of snacks & dessert food groups: EPIC-Norfolk Study

---

|                         |                                                                                                                                                                          |
|-------------------------|--------------------------------------------------------------------------------------------------------------------------------------------------------------------------|
| Cake                    | Cakes, pies, pastries, scones, muffins, chocolate cakes, éclairs, pastries with chocolate                                                                                |
| Dairy desserts          | Chocolate and non-chocolate dairy based desserts/sauces, ice-creams                                                                                                      |
| Puddings                | Cereal and chocolate based puddings, crumble, sponge pudding, suet pudding                                                                                               |
| Biscuits                | Chocolate and non-chocolate biscuits, with fruit, nuts, filled etc, including cereal bars                                                                                |
| Snacks                  | Crisps and other potato based snacks, bread/pastry type snacks (cheese pastry etc.)                                                                                      |
| Creams                  | Dairy creams (double, single, whipping/whipped, half fat, clotted, crème fraîche, dream topping) and non-dairy creams (Delight, Elmlea, Dessert Top, Tip Top soya cream) |
| Chocolate confectionary | Chocolate bars, chocolate sweets                                                                                                                                         |
| Other desserts          | Ice-lollies, sorbets, jelly, sweet egg dishes (meringues, soufflés)                                                                                                      |

---
